# Supplementary material
Source: bioRxiv or medRxiv preprint supplement (https://www.biorxiv.org/highwire/filestream/106670/field_highwire_adjunct_files/2/351635-3.pdf)
Supplement: Supplementary file [file 351635-3.pdf]

|                      |                      |                                                     |               |                                                         |                                                                                         |
|----------------------|----------------------|-----------------------------------------------------|---------------|---------------------------------------------------------|-----------------------------------------------------------------------------------------|
| M. truncatula IMA15  | Medicago truncatula  | MTR7q087600                                         | tr:G7L3N4     | Uniprot                                                 | MSSISNVVAPWCKKHGNDHGDGVVYDYPPTYVCEGDDDDDDGGDYAPAA                                       |
| M. notabilis IMA1    | Morus notabilis      |                                                     | tr:W9R8S0     | Uniprot                                                 | MPHITFMMVYIARNKGDGDNGDHYDHYFYQYNNLAPGEGDGDNDDDDDSGDYAPAA                                |
| M. notabilis IMA2    | Morus notabilis      |                                                     | tr:W9R8W7     | Uniprot                                                 | MFFPAVKLIVSELSKREDDGHEGNDGIRRYAPTOVMENYAGSDRDYNNLPNATMDGDDDDDDDDSSDYAPAA                |
| M. notabilis IMA3    | Morus notabilis      |                                                     | tr:W9R9D7     | Uniprot                                                 | MSPVSEKNVAILAMLCKKQNTIYGDVINGDFEYLNLDVTRIEGDDDDDDDDGGDYAPAA                             |
| O. sativa IMA1       | Oryza sativa         | LOC_Os01g45914 (Os.12629.1.S1 at, Os.12629.1.S2 at) | tr:A6M2Q3     | Uniprot                                                 | MAPVSEASFLVHDGIGIASFAVYAGAPCCSARGRMAETDGGDDDDDDYDCAPAA                                  |
| O. sativa IMA2       | Oryza sativa         | LOC_Os07q04920 (Os.12430.1.S1 at, Os.48053.1.A1 at) | tr:Q8HKK5     | Uniprot                                                 | MAIAKSECFRLAWALLESNLVSRRNSGDDDDVDVAPAA                                                  |
| P. sativum IMA1      | Psium sativum        |                                                     |               | OR-EST, IPK, Gatersleben, EST: PSS11L02U                | MVITISMESTLPMFLMDNHLIATERICGCSKSEKDDDDDDIAPAA                                           |
| P. vulgaris IMA1     | Phaseolus vulgaris   | PHAVU003G160300                                     | tr:V7C9W0     | Uniprot                                                 | MAFTSKLIAPCCNHHALHONHAPPTIFIEESVFRNGHGSVSRVPAASMEGDDDDDDSGDYAPAA                        |
| P. vulgaris IMA2     | Phaseolus vulgaris   | PHAVU006G028300                                     | tr:V7BK02     | Uniprot                                                 | MLLFISCTKSLPLFIKNDWPETIFPLHHEGDDDDDDGGDVPAA                                             |
| P. vulgaris IMA3     | Phaseolus vulgaris   | PHAVU008G196700                                     | tr:V7B6K1     | Uniprot                                                 | MMFFVCKEYGLVLSNDWPAATHDFNHFEGDDDDNNGVDVAPAA                                             |
| P. trichocarpa IMA1  | Populus trichocarpa  |                                                     | tr:B9H621     | Uniprot                                                 | MSPLSKTIATFTHRHADGDDGGYGYDYAPAAACMEGDDDDDDSGDYAPAAAPMEGDDDDDDGGDYAPAA                   |
| R. communis IMA1     | Ricinus communis     |                                                     | tr:B9STP1     | Uniprot                                                 | MVHMALFARSSGKCSSTNLADONKIDYLVGYNEFSMAEPLIEDDGDGDDDDGGDYDFAPAALEGGDDDDDDGGDYAPAA         |
| R. communis IMA2     | Ricinus communis     |                                                     | tr:B9STP2     | Uniprot                                                 | MSLFAISKAITISCCNKLADDCNNGDGYCFAPFPICEGGDDDDDDGGDYDYAPAAASSEGGDDDDDDGGDYDCAPAA           |
| R. communis IMA3     | Ricinus communis     |                                                     | tr:B9STP3     | Uniprot                                                 | MSPLSKVIASWCNKPVVEEEMGNDDDRVYEPATSTEGDDDDDDDDKDCAPAA                                    |
| S. lycopersicum IMA1 | Solanum lycopersicum |                                                     | tr:M1AZY7     | Uniprot: solgenomics.wur.nl - transcript ID: SGN-E11357 | MTEISFHLNFKIELTRPVISFCLNRELENDDDDDDDGKVPAA                                              |
| S. lycopersicum IMA2 | Solanum lycopersicum | Solyc07g044900.1                                    | tr:K4CEP8     |                                                         | MVIVRGNTTFPLPGRIEARPVNFGLNREFADDSDDDDDGGKVPAA                                           |
| S. lycopersicum IMA3 | Solanum lycopersicum | Solyc07g044910.1                                    | tr:K4CEP9     |                                                         | MVIVRGNTSRFHPYIEARLVISFYNLRELENDVDDDDDDDDGKVPAA                                         |
| S. lycopersicum IMA4 | Solanum lycopersicum | Solyc12g006720.1                                    | tr:K4DBK9     |                                                         | MSSQITILMNSICNPNHDVGSHVYESRSMMDRHATGCVYSATWFEDDSDDDDDDDADYAPAA                          |
| S. lycopersicum IMA5 | Solanum lycopersicum | Solyc12g006730.1                                    | tr:K4DBL0     |                                                         | MSITFMIIIGFEKRRSCAGDYDYTAASLEGDDDDGGDYAPAALEGNDDGGDYAPAALEGGDDDDGGDYAPAA                |
| S. lycopersicum IMA6 | Solanum lycopersicum | Solyc12g006750.1                                    | tr:K4DBL2     |                                                         | MFGIFKIIIGFEKRRSCLDGGDDGGDYDYAPAAKLRNGDDGGDYDYAPAALEGGDDDDGGDYAPAALEGGDDDDGGDYAPAA      |
| S. lycopersicum IMA7 | Solanum lycopersicum | Solyc12g006760.1                                    | tr:K4DBL3     |                                                         | MSSGILKIIIGFEKRRSCLDGGDDGGDYDYAPAALEGGDDDDGGDYDYAPAALEGGDDDDGGDYAPAALEGGDDDDGGDYAPAA    |
| S. lycopersicum IMA8 | Solanum lycopersicum | Solyc12g006770.1                                    | tr:K4DBL4     |                                                         | MSSGIFKIIIGFEKRRSCLDGGDDGGDYDYAPAALEGGDDDDGGDYDYAPAALEGGDDDDGGDYDYAPAALEGGDDDDGGDYAPAA  |
| S. lycopersicum IMA9 | Solanum lycopersicum | Solyc12g006780.1                                    | tr:K4DBL5     |                                                         | MSSIFKIIIGFEKRRSCLDGGDDGGDYDYAPAALEGGDDDDGGDYDYAPAALEGGDDDDGGDYDYAPAALEGGDDDDGGDYAPAA   |
| S. tuberosum IMA1    | Solanum tuberosum    |                                                     | tr:M0ZJ9      |                                                         | MAGKSGRKRVRGYSKSKAVYFVKIRHSGCIIFGSKYKSCSYGSEDDDDDEHDYAPATYLERDDDDDDGGDYDYAPAALETT       |
| S. tuberosum IMA2    | Solanum tuberosum    |                                                     | tr:M1AZ77     | Phytozome.net                                           | MVVMINANKKVSIGCPDKFMAATEAKLGSTICIDKECEADDDYNDSDASKIAPAA                                 |
| S. tuberosum IMA3    | Solanum tuberosum    |                                                     | tr:M1BUQ1     |                                                         | MSSGTFKIIIGFEKRRSSDGDDEGYNYAPVTCLEGGDDDDNDAYDYASAPFLEGGDDDDGGDYDYAPATSELEGNDDGGDYAPAA   |
| S. tuberosum IMA4    | Solanum tuberosum    |                                                     | tr:M1BUQ2     |                                                         | MSTIFKIIIGFEKRRSCLDGGDDGGDYDYAPAALEGGDDDDGGDYDYAPAALEGGDDDDGGDYDYAPAALEGGDDDDGGDYDYAPAA |
| S. tuberosum IMA5    | Solanum tuberosum    |                                                     | tr:M1BUQ3     |                                                         | MSITFKIIIGFEKRRSCLDGGDDGGDYDYAPAALEGGDDDDGGDYDYAPAALEGGDDDDGGDYDYAPAALEGGDDDDGGDYDYAPAA |
| S. tuberosum IMA6    | Solanum tuberosum    |                                                     | tr:M1BUQ4     |                                                         | MSSIFKIIIGFEKRRSCLDGGDDGGDYDYAPAALEGGDDDDGGDYDYAPAALEGGDDDDGGDYDYAPAALEGGDDDDGGDYDYAPAA |
| S. tuberosum IMA7    | Solanum tuberosum    |                                                     | tr:M1BUQ5     |                                                         | MSSIFKIIIGFEKRRSCLDGGDDGGDYDYAPAALEGGDDDDGGDYDYAPAALEGGDDDDGGDYDYAPAALEGGDDDDGGDYDYAPAA |
| S. tuberosum IMA8    | Solanum tuberosum    |                                                     | tr:M1BUQ6     |                                                         | MSSIFKIIIGFEKRRSCLDGGDDGGDYDYAPAALEGGDDDDGGDYDYAPAALEGGDDDDGGDYDYAPAALEGGDDDDGGDYDYAPAA |
| S. tuberosum IMA9    | Solanum tuberosum    |                                                     | tr:M1BUQ8     |                                                         | MSSIFKIIIGFEKRRSCLDGGDDGGDYDYAPAALEGGDDDDGGDYDYAPAALEGGDDDDGGDYDYAPAALEGGDDDDGGDYDYAPAA |
| S. tuberosum IMA10   | Solanum tuberosum    |                                                     | tr:M1BUQ9     |                                                         | MSSIFKIIIGFEKRRSCLDGGDDGGDYDYAPAALEGGDDDDGGDYDYAPAALEGGDDDDGGDYDYAPAALEGGDDDDGGDYDYAPAA |
| S. tuberosum IMA11   | Solanum tuberosum    |                                                     | tr:M1BUS5     |                                                         | MSQISTILMNSICNLTFDYHVERGNHDIQSHVYESTSMMDRHVIGCIYVSAWTFEDDGGDDDDDDDDADYAPAA              |
| S. tuberosum IMA12   | Solanum tuberosum    |                                                     | tr:M1BUS6     |                                                         | MSEIFTIIGFEKRRSCLDGGDDGGDYDYAPAALEGGDDDDGGDYDYAPAALEGGDDDDGGDYDYAPAALEGGDDDDGGDYDYAPAA  |
| S. tuberosum IMA13   | Solanum tuberosum    |                                                     | tr:M1CZG2     |                                                         | MSSGFKIIGFEKRRSCLDGGDDGGDYDYAPAALEGGDDDDGGDYDYAPAALEGGDDDDGGDYDYAPAALEGGDDDDGGDYDYAPAA  |
| T. cacao IMA1        | Theobroma cacao      |                                                     | tr:A0A061GM26 |                                                         | MSSKCIIMHDEINIKIGSSKMIINDVHDDKGRDGYVSNKSLVGGSNYHVPASVVDGDDDDDDGGDYDYAPAA                |
| T. urartu IMA1       | Triticum urartu      | TRIUR301690                                         | tr:M8A3M8     |                                                         | MAPASKIMSHIVODGGIAAYAVYAAPCDWCGGRHRKAESDGGDDDDGGDYDYAPAA                                |
| T. urartu IMA2       | Triticum urartu      | TRIUR318332                                         | tr:M8A648     |                                                         | MAPASKIMSHIVODGGIAAYAVYAAPCDWCGGRHRKAESDGGDDDDGGDYDYAPAA                                |
| T. urartu IMA3       | Triticum urartu      | TRIUR329839                                         | tr:M8ACF3     |                                                         | MAPASKIMSHIVODGGIATYAVYAAPCDWCGGRHRKAESDGGDDDDGGDYDYAPAA                                |
| V. vinifera IMA1     | Vitis vinifera       |                                                     | gi:349713816  |                                                         | MSSISMAISDSQSMHHDGHVREHDKGHVYCTNDNNGCYALTPAREGDGDDDDGGDYDYAPAA                          |
| Z. mays IMA1         | Zea mays             |                                                     | tr:A0A096QR9  |                                                         | MAPVSSEAAAYLVLIKIGSIAASSRAVYPWDGCSARGRMETDSDDDDDGGDYDYAPAA                              |
